# Supplementary material for: MicroRNA-361-Mediated Inhibition of HSP90 Expression and EMT in Cervical Cancer Is Counteracted by Oncogenic lncRNA NEAT1
Source: PubMed Central journal article supplement (PMC7140536; doi:10.3390/cells9030632), 2020-03-05
Supplement: cells-09-00632-s001.pdf [file cells-09-00632-s001.pdf]

# MicroRNA-361- Mediated Inhibition of HSP90 Expression and EMT in Cervical Cancer is Counteracted by Oncogenic lncRNA NEAT1

Daozhi Xu <sup>1,†</sup>, Peixin Dong <sup>1,†,\*</sup>, Ying Xiong <sup>2,†</sup>, Junming Yue <sup>3,4</sup>, Yosuke Konno <sup>1</sup>, Kei Ihira <sup>1</sup>, Noriko Kobayashi <sup>1</sup>, Yukiharu Todo <sup>5</sup> and Hidemichi Watari <sup>1,\*</sup>

1. Department of Obstetrics and Gynecology, Hokkaido University School of Medicine, Hokkaido University, Sapporo, Japan; xudaozhi87@yahoo.co.jp (D.H.); dpx1cn@gmail.com (P.D.); konsuke013@gmail.com (Y.K.); ihey0610@huhp.hokudai.ac.jp (K.I.); norikingyo@med.hokudai.ac.jp (N.K.); watarih@med.hokudai.ac.jp (H.W.)
  2. Department of Gynecology, State Key Laboratory of Oncology in South China, Sun Yat-sen University Cancer Center, Guangzhou, P. R. China; tdken999@163.com
  3. Department of Pathology and Laboratory Medicine, University of Tennessee Health Science Center, Memphis, TN 38163, USA; jyue@uthsc.edu
  4. Center for Cancer Research, University of Tennessee Health Science Center, Memphis, TN 38163, USA
  5. Division of Gynecologic Oncology, National Hospital Organization, Hokkaido Cancer Center, Sapporo, Japan; yukiharu@sap-cc.go.jp
- \* Correspondence: dpx1cn@gmail.com (D.P); watarih@med.hokudai.ac.jp (H.W.)

## Bioinformatics analysis

### UALCAN database

The expression of *HSP90* in cervical cancer tissues and normal cervical tissues, and clinical information was extracted from the UALCAN database [43], which downloaded the level-3 TCGA RNA-sequencing data representing 31 cancer types from the TCGA website. The expression of *HSP90* was analyzed in cervical cancer tissues ( $n = 305$ ) and normal cervical tissues ( $n = 3$ ). The “raw\_count” column shows the number of unfiltered fragments that are aligned with gene, and the “scaled\_estimate” column provides the estimation of transcripts generated from *HSP90* gene. The “scaled\_estimate” was multiplied by  $10^6$  to obtain transcripts per million (TPM) expression value using in-house PERL (Practical Extraction and Report Language) program. TPM expression value was used to estimate *HSP90* gene expression. Patient clinical parameters (such as age, sex, race, survival status, tumor grade, and tumor stage) were retrieved as XML (eXtensible Markup Language) files from Genomic Data commons (<https://gdc.cancer.gov/>). Integration processing of datasets was implemented using Perl (<http://www.perl.org/>) scripting tools. TCGA RNA-sequencing data corresponding to the primary cervical cancer and normal cervical samples for *HSP90* gene expression was represented as boxplots.

### Human Protein Atlas database

We examined the *HSP90* protein expression in human cervical cancer tissues and adjacent normal tissues using the Human Protein Atlas database [44], which provides data on the protein expression patterns of various cell types in both cancerous and normal tissues. *HSP90* protein expression was evaluated using immunohistochemistry on cervical cancer samples tissue microarray ( $n = 24$ ). This database also contains the TCGA RNA-sequencing data from different forms of human cancers, and the FPKMs (number Fragments Per Kilobase of exon per Million reads) for *HSP90* gene were subsequently used for quantification of *HSP90* expression in cervical cancer tissues. According

to the FPKM value of *HSP90* gene, cervical cancer patients were classified into two expression groups: patients with lower expression of *HSP90* ( $n = 208$ ) and those with higher expression of *HSP90* ( $n = 83$ ). The correlation between *HSP90* expression level and patient survival was examined using Kaplan-Meier survival estimators, and the survival outcomes of the two groups were compared by log-rank tests.

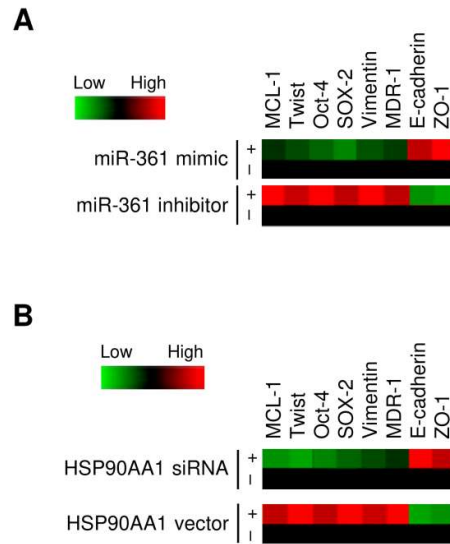

**Supplemental Figure 1:** MiR-361 inhibits EMT in cervical cancer cells. **(A)** The color-coded scale depicting expression changes of indicated mRNAs in cervical cancer cells after overexpression or knockdown of miR-361, as determined by quantitative real-time PCR analysis. Red: upregulation; green: downregulation. **(B)** The color-coded scale depicting expression changes of indicated mRNAs in cervical cancer cells after overexpression or knockdown of HSP90, as determined by quantitative real-time PCR analysis. Red: upregulation; green: downregulation.
